# Supplementary material for: Ovarian Function Modulates the Effects of Long-Chain Polyunsaturated Fatty Acids on the Mouse Cerebral Cortex
Source: PubMed Central journal article supplement (PMC5928148; doi:10.3389/fncel.2018.00103), 2018-04-24
Supplement: Image_1.pdf [file Image_1.pdf]

## Supplementary Figure 1

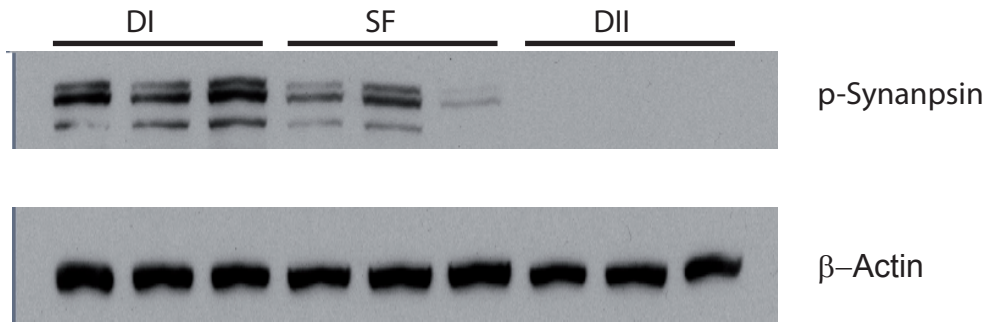

Western blots (WBs) from three arbitrary samples from sham-mice group, fed with DI, DII or SF. WBs (25 ug/lane) were analysed with antibodies against pSynapsin (as presented in the manuscript, Figure 3) and  $\beta$ -actin as loading control

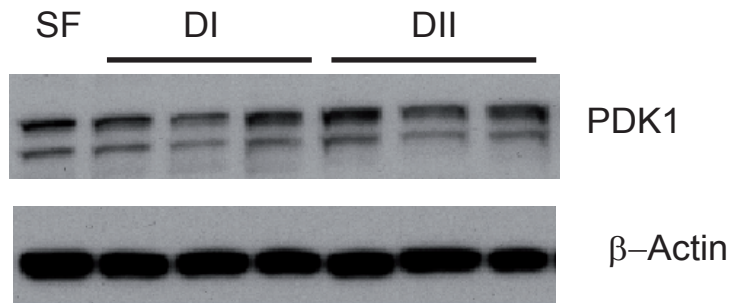

Western blot from three arbitrary samples from sham-mice group fed with DI, DII and one sample from SF. WBs (25 ug/lane) were analysed with antibodies against PDK1 and  $\beta$ -actin. Not appreciable differences were observed in both cases.
